# Supplementary material for: PD-L1 Overexpression, SWI/SNF Complex Deregulation, and Profound Transcriptomic Changes Characterize Cancer-Dependent Exhaustion of Persistently Activated CD4+ T Cells
Source: MDPI journal article supplement (doi:10.3390/cancers13164148), 2021-08-18
Supplement: s1 [file s1]

Table S1. The list of primers used for qRT-PCR method and ChIP analysis.

| Method    | Primer pair/ <i>Gene</i> | Forward                      | Reverse                     |
|-----------|--------------------------|------------------------------|-----------------------------|
| RT-qPCR   | <i>ALDO</i>              | 5'-GACTCATCTGCAGCCAGGA-3'    | 5'-GAATTTCTCTGAAGCACGC-3'   |
|           | <i>BAF155</i>            | 5'-ACTTGTAAGCAGCCCCAAGA-3'   | 5'-GCAGCTTCTTCAGTTCCAGG-3'  |
|           | <i>BAF170</i>            | 5'-ACAGACATCACCCGCTAGGT-3'   | 5'-ACGGCAAGAACAAGTCCAAG-3'  |
|           | <i>BRG1</i>              | 5'-GCAACAGTACTGCCAGCAAC-3'   | 5'-GACATTCCAGTCTCGACCCC-3'  |
|           | <i>BRM</i>               | 5'-TCCGAGGCAAAATCAGTCAAG-3'  | 5'-TTCCTCGATTTGGCCTTTTCT-3' |
|           | <i>ENO</i>               | 5'-GCCTCCTGCTCAAAGTCAAC-3'   | 5'-AACGATGAGACACCATGACG-3'  |
|           | <i>GAPDH</i>             | 5'-GAAGGTGAAGGTCGGAGTC-3'    | 5'-GAAGATGGTGATGGGATTTC-3'  |
|           | <i>IL-1b</i>             | 5'-CTCCGGGACTCACAGCAAAA-3'   | 5'-TTCAACACGCAGGACAGGT-3'   |
|           | <i>IL-6</i>              | 5'-TGCAATAACCACCCCTGACC-3'   | 5'-GTGCCATGCTACATTTGCC-3'   |
|           | <i>IN11</i>              | 5'-GACCAGGACAGGAACACGAG-3'   | 5'-CAAATGGAATGTGTGCCGG-3'   |
|           | <i>LDHa</i>              | 5'-GCCAGAGACAATCTTTGGTG-3'   | 5'-GGCCTGTGCCATCAGTATCT-3'  |
|           | <i>p21 (CDKN1A)</i>      | 5'-AAGACCATGTGGACCTGTCA-3'   | 5'-GGCTTCCTCTTGGAGAAGAT-3'  |
|           | <i>PD-L1</i>             | 5'-AAATGGAACCTGGCGAAAGC-3'   | 5'-GATGAGCCCCTCAGGCATTT-3'  |
|           | <i>PKM2</i>              | 5'-GTCTGAATGAAGGCAGTCCC-3'   | 5'-TGCAGTGGAGCTCAGAGAGA-3'  |
|           | <i>UBC</i>               | 5'-ATTTGGGTCGCGGTTCTTG-3'    | 5'-TGCCTTGACATTCTCGATGGT-3' |
|           | <i>VEGFa</i>             | 5'-AGTACCCTGATGAGATCGAG-3'   | 5'-CTTTCTTTGGTCTGCATTAC-3'  |
|           | <i>VEGFb</i>             | 5'-GAGATGTCCCTGGAAGAACACA-3' | 5'-GAGTGGGATGGGTGATGTCAG-3' |
| ChIP-qPCR | Satach4                  | 5'-CTGCACTACCTGAAGAGGAC-3'   | 5'-GATGGTTCAACACTCTTACA-3'  |
|           | CD274_1                  | 5'-CTAGAAGTTCAGCGCGGGAT-3'   | 5'-GGCTGCGGAAGCCTATTCTA-3'  |
|           | CD274_2                  | 5'-TTCCGCAGCCTTAATCCTTA-3'   | 5'-CGTGGATTCTGTGACTTCCTC-3' |
|           | CD274_3                  | 5'-CGAGGAACTTTGAGGAAGTCA-    | 5'-                         |

|  |          |                                  |                                  |
|--|----------|----------------------------------|----------------------------------|
|  |          | 3'                               | AAAGTCAGCAGCAGACCCATA-3'         |
|  | CD274_4  | 5'-ATGGGTCTGCTGCTGACTTT-3'       | 5'-ACCTTCAGAGGGGTAAGAGC-3'       |
|  | CD274_5  | 5'-<br>ACCCCTCTGAAGGTAAAATCAA-3' | 5'-<br>ACCCCTCTGAAGGTAAAATCAA-3' |
|  | CD274_6  | 5'-TTCCCGGTGAAAATCTCATT-3'       | 5'-TCCTGACCTTCGGTGAAATC-3'       |
|  | CD274_7  | 5'-CGAAGGTCAGGAAAGTCCAA-3'       | 5'-GAAGCTGCGCAGAACTGG-3'         |
|  | CD274_8  | 5'-CAGTTCTGCGCAGCTTCC-3'         | 5'-GACCCTCCGTCCTAAAGTGC-3'       |
|  | CD274_9  | 5'-TAGCTCGCTGGGCACTTTAG-3'       | 5'-CAGATGCATTGCCTGTTCTT-3'       |
|  | CD274_10 | 5'-AATGCATCTGGCCTTCCTC-3'        | 5'-<br>TGAACACACAGTCGCATAAGAA-3' |
|  | CD274_11 | 5'-TGCGACTGTGTGTTTCAAGT-3'       | 5'-ATGCTGCAGCTGGGATAACT-3'       |

Table S3. The list of most important genes changed upon co-cultivation of CD4<sup>+</sup> T cells with cancer cells (T15M) vs CD4<sup>+</sup> T cells without cancer cells (T15).

| Gene name | Fold change (T15MvsT15) | pValue   | Function in cancer                                                                               | References                                                                                                                                                                                                                                                                                                                                                                                                                                                            |
|-----------|-------------------------|----------|--------------------------------------------------------------------------------------------------|-----------------------------------------------------------------------------------------------------------------------------------------------------------------------------------------------------------------------------------------------------------------------------------------------------------------------------------------------------------------------------------------------------------------------------------------------------------------------|
| IL1A      | 50.11281                | 6.87E-05 | Inflammatory factor, pro-tumor and anti-tumor effect                                             | Baker KJ, Houston A and Brint E (2019) IL-1 Family Members in Cancer; Two Sides to Every Story. Front. Immunol. 10:1197. doi: 10.3389/fimmu.2019.01197.                                                                                                                                                                                                                                                                                                               |
| IL1B      | 33799.64                | 0.001665 | Pro-inflammatory, pro-tumorigenic and anti-tumor function depending on cell type and tumor stage | Pereira, J.F.S.; Jordan, P.; Matos, P. A Signaling View into the Inflammatory Tumor Microenvironment. Immuno 2021, 1, 91-118. <a href="https://doi.org/10.3390/immuno1020007">https://doi.org/10.3390/immuno1020007</a> , Jang, JH., Kim, DH. & Surh, YJ. Dynamic roles of inflammasomes in inflammatory tumor microenvironment. npj Precis. Onc. 5, 18 (2021). <a href="https://doi.org/10.1038/s41698-021-00154-7">https://doi.org/10.1038/s41698-021-00154-7</a> . |
| IL6       | 3916.794                | 4.99E-20 | Pro-inflammatory role, tumor promoting function and anti-tumor function                          | Toshio Hirano, IL-6 in inflammation, autoimmunity and cancer, International Immunology, Volume 33, Issue 3, March 2021, Pages 127–148, <a href="https://doi.org/10.1093/intimm/dxaa078">https://doi.org/10.1093/intimm/dxaa078</a><br>Fisher, D.T.; Appenheimer, M.M.; Evans, S.S. The two faces of IL-6 in the tumor microenvironment. Semin. Immunol. 2014, 26, 38–47, doi:10.1016/j.smim.2014.01.008.                                                              |

|       |          |          |                                 |                                                                                                                                                                                                                                                                                                                                                                                                                                                                                                                                                                                  |
|-------|----------|----------|---------------------------------|----------------------------------------------------------------------------------------------------------------------------------------------------------------------------------------------------------------------------------------------------------------------------------------------------------------------------------------------------------------------------------------------------------------------------------------------------------------------------------------------------------------------------------------------------------------------------------|
| IL9   | 0.216019 | 0.056806 | Pro-tumor and anti-tumor effect | Wan J, Wu Y, Ji X, Huang L, Cai W, Su Z, Wang S, Xu H. IL-9 and IL-9-producing cells in tumor immunity. <i>Cell Commun Signal</i> . 2020 Mar 30;18(1):50. doi: 10.1186/s12964-020-00538-5. PMID: 32228589; PMCID: PMC7104514.                                                                                                                                                                                                                                                                                                                                                    |
| IL15  | 3.093425 | 0.014264 | Tumor promoting function        | Fiore PF, Di Matteo S, Tumino N, et al. Interleukin-15 and cancer: some solved and many unsolved questions <i>Journal for ImmunoTherapy of Cancer</i> 2020;8:e001428. doi: 10.1136/jitc-2020-001428                                                                                                                                                                                                                                                                                                                                                                              |
| IL24  | 144.3807 | 1.14E-18 | Anti-tumor function             | Ma YF, Ren Y, Wu CJ, Zhao XH, Xu H, Wu DZ, Xu J, Zhang XL, Ji Y. Interleukin (IL)-24 transforms the tumor microenvironment and induces anticancer immunity in a murine model of colon cancer. <i>Mol Immunol</i> . 2016 Jul;75:11-20. doi: 10.1016/j.molimm.2016.05.010. Epub 2016 May 19. PMID: 27209087.                                                                                                                                                                                                                                                                       |
| CCL20 | 172.3063 | 1.87E-18 | Tumor promoting function        | Kadomoto S, Izumi K, Mizokami A. The CCL20-CCR6 Axis in Cancer Progression. <i>Int J Mol Sci</i> . 2020 Jul 22;21(15):5186. doi: 10.3390/ijms21155186. PMID: 32707869; PMCID: PMC7432448.                                                                                                                                                                                                                                                                                                                                                                                        |
| CXCL1 | 19045.09 | 0.002966 | Tumor promoting function        | Yu S, Yi M, Xu L, Qin S, Li A and Wu K (2020) CXCL1 as an Unfavorable Prognosis Factor Negatively Regulated by DACH1 in Non-small Cell Lung Cancer. <i>Front. Oncol</i> . 9:1515. doi: 10.3389/fonc.2019.01515, Wang, N., Liu, W., Zheng, Y. et al. CXCL1 derived from tumor-associated macrophages promotes breast cancer metastasis via activating NF-κB/SOX4 signaling. <i>Cell Death Dis</i> 9, 880 (2018). <a href="https://doi.org/10.1038/s41419-018-0876-3">https://doi.org/10.1038/s41419-018-0876-3</a>                                                                |
| CXCL2 | 4821.445 | 1.61E-13 | Tumor promoting function        | Feliciano, P. CXCL1 and CXCL2 link metastasis and chemoresistance. <i>Nat Genet</i> 44, 840 (2012). <a href="https://doi.org/10.1038/ng.2379">https://doi.org/10.1038/ng.2379</a> , Zhang F, Jiang J, Xu B, Xu Y, Wu C. Over-expression of CXCL2 is associated with poor prognosis in patients with ovarian cancer. <i>Medicine</i> . 2021;100:4(e24125).                                                                                                                                                                                                                        |
| CXCL3 | 2755.866 | 6.34E-25 | Tumor promoting function        | Gui SL, Teng LC, Wang SQ, Liu S, Lin YL, Zhao XL, Liu L, Sui HY, Yang Y, Liang LC, Wang ML, Li XY, Cao Y, Li FY, Wang WQ. Overexpression of CXCL3 can enhance the oncogenic potential of prostate cancer. <i>Int Urol Nephrol</i> . 2016 May;48(5):701-9. doi: 10.1007/s11255-016-1222-2. Epub 2016 Feb 2. PMID: 26837773, Qi YL, Li Y, Man XX, Sui HY, Zhao XL, Zhang PX, Qu XS, Zhang H, Wang BX, Li J, Qi SF, Jia LL, Luan HY, Zhang CB, Wang WQ. CXCL3 overexpression promotes the tumorigenic potential of uterine cervical cancer cells via the MAPK/ERK pathway. <i>J</i> |

|        |          |          |                                                                               |                                                                                                                                                                                                                                                                                                                                                                                                                                                                                                                           |
|--------|----------|----------|-------------------------------------------------------------------------------|---------------------------------------------------------------------------------------------------------------------------------------------------------------------------------------------------------------------------------------------------------------------------------------------------------------------------------------------------------------------------------------------------------------------------------------------------------------------------------------------------------------------------|
|        |          |          |                                                                               | Cell Physiol. 2020 May;235(5):4756-4765. doi: 10.1002/jcp.29353. Epub 2019 Oct 30. PMID: 31667838.                                                                                                                                                                                                                                                                                                                                                                                                                        |
| CXCL5  | 577.3176 | 0.055265 | Tumor promoting function                                                      | Zhang W, Wang H, Sun M, et al. CXCL5/CXCR2 axis in tumor microenvironment as potential diagnostic biomarker and therapeutic target. Cancer Communications. 2020;40:69–80. 10.1002/cac2.12010                                                                                                                                                                                                                                                                                                                              |
| CXCL8  | 23.43699 | 5.16E-06 | Pro-inflammatory, induces proliferation and prevent apoptosis of cancer cells | Pereira, J.F.S.; Jordan, P.; Matos, P. A Signaling View into the Inflammatory Tumor Microenvironment. Immuno 2021, 1, 91-118. <a href="https://doi.org/10.3390/immuno1020007">https://doi.org/10.3390/immuno1020007</a> .                                                                                                                                                                                                                                                                                                 |
| CXCL9  | 66.22369 | 1.89E-06 | Pro-tumor and anti-tumor effect                                               | Neo SY, Lundqvist A. The Multifaceted Roles of CXCL9 Within the Tumor Microenvironment. Adv Exp Med Biol. 2020;1231:45-51. doi: 10.1007/978-3-030-36667-4_5. PMID: 32060845.                                                                                                                                                                                                                                                                                                                                              |
| CXCL10 | 31.79693 | 8.02E-22 | Pro-tumor and anti-tumor effect                                               | Tokunaga R, Zhang W, Naseem M, Puccini A, Berger MD, Soni S, McSkane M, Baba H, Lenz HJ. CXCL9, CXCL10, CXCL11/CXCR3 axis for immune activation - A target for novel cancer therapy. Cancer Treat Rev. 2018 Feb;63:40-47. doi: 10.1016/j.ctrv.2017.11.007. Epub 2017 Nov 26. PMID: 29207310; PMCID: PMC5801162.                                                                                                                                                                                                           |
| CXCL11 | 101.7608 | 0.000101 | Pro-tumor and anti-tumor effect                                               | Tokunaga R, Zhang W, Naseem M, Puccini A, Berger MD, Soni S, McSkane M, Baba H, Lenz HJ. CXCL9, CXCL10, CXCL11/CXCR3 axis for immune activation - A target for novel cancer therapy. Cancer Treat Rev. 2018 Feb;63:40-47. doi: 10.1016/j.ctrv.2017.11.007. Epub 2017 Nov 26. PMID: 29207310, Cao Y, Jiao N, Sun T, Ma Y, Zhang X, Chen H, Hong J and Zhang Y (2021) CXCL11 Correlates With Antitumor Immunity and an Improved Prognosis in Colon Cancer. Front. Cell Dev. Biol. 9:646252. doi: 10.3389/fcell.2021.646252. |
| CXCL13 | 16.07915 | 3.5E-09  | Pro-tumor and anti-tumor effect                                               | Hussain M, Adah D, Tariq M, Lu Y, Zhang J, Liu J. CXCL13/CXCR5 signaling axis in cancer. Life Sci. 2019 Jun 15;227:175-186. doi: 10.1016/j.lfs.2019.04.053.                                                                                                                                                                                                                                                                                                                                                               |
| CXCL16 | 19.54248 | 2.22E-06 | Pro-tumor and anti-tumor effect                                               | Korbecki J, Bajdak-Rusinek K, Kupnicka P, Kapczuk P, Simińska D, Chlubek D, Baranowska-Bosiacka I. The Role of CXCL16 in the Pathogenesis of Cancer and Other Diseases. Int J Mol Sci. 2021 Mar 28;22(7):3490. doi: 10.3390/ijms22073490.                                                                                                                                                                                                                                                                                 |
| CD274  | 6.094112 | 1.48E-07 | Promotes tumor immune evasion                                                 | Han Y, Liu D, Li L. PD-1/PD-L1 pathway: current researches in cancer. Am J Cancer Res. 2020 Mar 1;10(3):727-742.                                                                                                                                                                                                                                                                                                                                                                                                          |
| CTLA4  | 2.771362 | 0.032166 | Promotes tumor immune evasion                                                 | Liu Y, Zheng P. How Does an Anti-CTLA-4 Antibody Promote Cancer Immunity? Trends Immunol. 2018 Dec;39(12):953-956. doi:                                                                                                                                                                                                                                                                                                                                                                                                   |

|       |          |          |                                |                                                                                                                                                                                                                                                                                                                  |
|-------|----------|----------|--------------------------------|------------------------------------------------------------------------------------------------------------------------------------------------------------------------------------------------------------------------------------------------------------------------------------------------------------------|
|       |          |          |                                | 10.1016/j.it.2018.10.009.                                                                                                                                                                                                                                                                                        |
| VEGFA | 6.185286 | 4.03E-10 | Induces angiogenesis           | Apte RS, Chen DS, Ferrara N. VEGF in Signaling and Disease: Beyond Discovery and Development. Cell. 2019 Mar 7;176(6):1248-1264. doi: 10.1016/j.cell.2019.01.021.                                                                                                                                                |
| VEGFB | 2.258515 | 0.000455 | Induces angiogenesis           | Apte RS, Chen DS, Ferrara N. VEGF in Signaling and Disease: Beyond Discovery and Development. Cell. 2019 Mar 7;176(6):1248-1264. doi: 10.1016/j.cell.2019.01.021.                                                                                                                                                |
| VEGFC | 2489.806 | 1.65E-14 | Induces angiogenesis           | Apte RS, Chen DS, Ferrara N. VEGF in Signaling and Disease: Beyond Discovery and Development. Cell. 2019 Mar 7;176(6):1248-1264. doi: 10.1016/j.cell.2019.01.021.                                                                                                                                                |
| IDO1  | 43270.02 | 8.01E-25 | Promotes tumor immune evasion  | Yao Y, Liang H, Fang X, Zhang S, Xing Z, Shi L, Kuang C, Seliger B, Yang Q. What is the prospect of indoleamine 2,3-dioxygenase 1 inhibition in cancer? Extrapolation from the past. J Exp Clin Cancer Res. 2021 Feb 8;40(1):60. doi: 10.1186/s13046-021-01847-4.                                                |
| MMP1  | 22316.05 | 8.83E-23 | Promotion of tumor progression | Quintero-Fabián S, Arreola R, Becerril-Villanueva E, Torres-Romero JC, Arana-Argáez V, Lara-Riegos J, Ramírez-Camacho MA and Alvarez-Sánchez ME (2019) Role of Matrix Metalloproteinases in Angiogenesis and Cancer. Front. Oncol. 9:1370. doi: 10.3389/fonc.2019.01370                                          |
| CSF3  | 21270.7  | 1.91E-21 | Tumor promoting effect         | Saunders AS, Bender DE, Ray AL, Wu X, Morris KT (2021) Colony-stimulating factor 3 signaling in colon and rectal cancers: Immune response and CMS classification in TCGA data. PLOS ONE 16(2): e0247233. <a href="https://doi.org/10.1371/journal.pone.0247233">https://doi.org/10.1371/journal.pone.0247233</a> |
