# Supplementary figures and images for: PD-L1 Overexpression, SWI/SNF Complex Deregulation, and Profound Transcriptomic Changes Characterize Cancer-Dependent Exhaustion of Persistently Activated CD4+ T Cells
Source: MDPI journal article supplement (doi:10.3390/cancers13164148), 2021-08-18

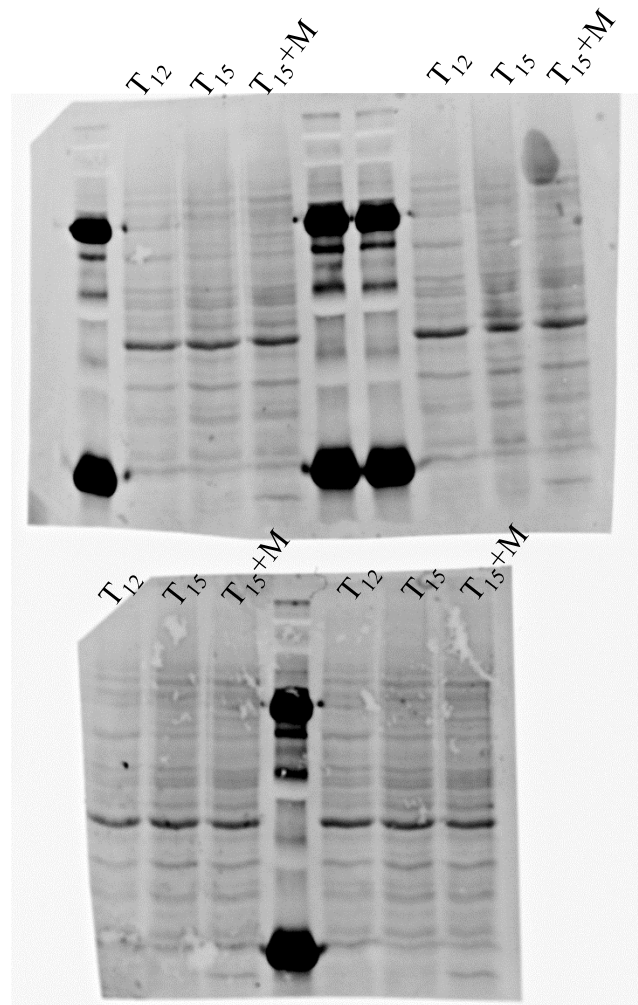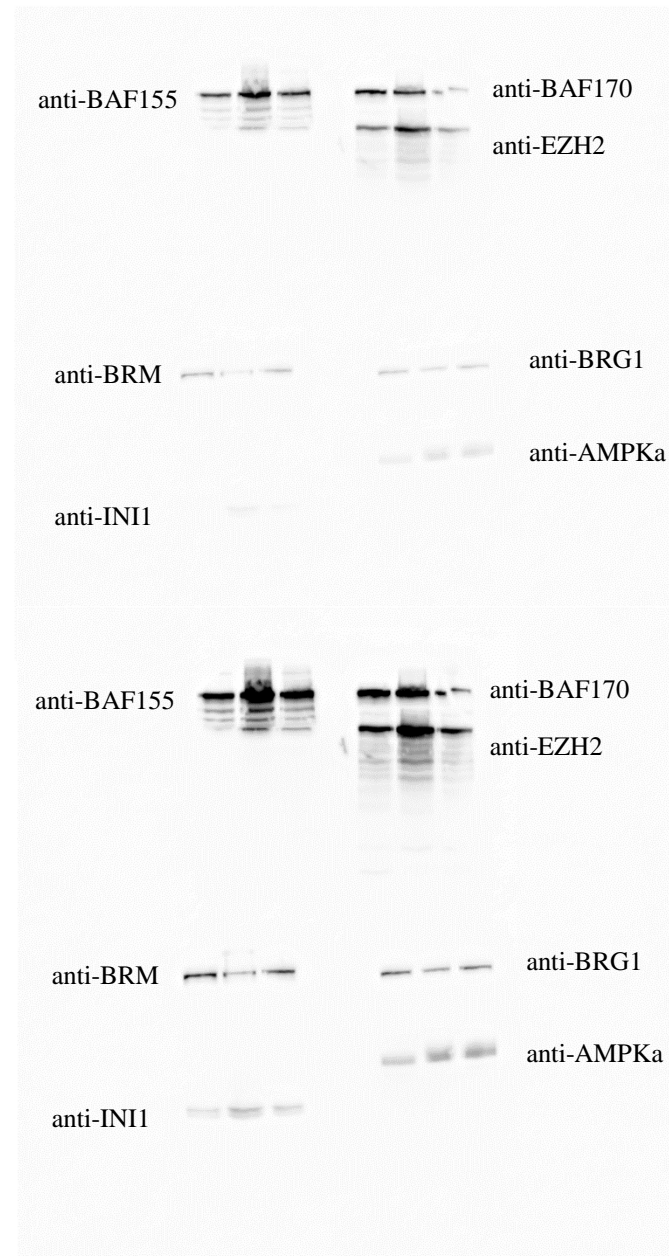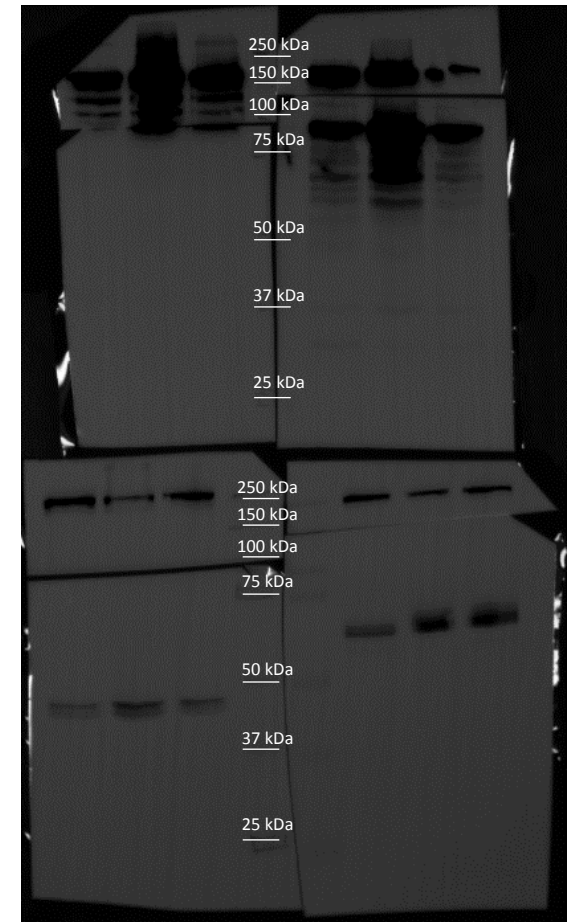

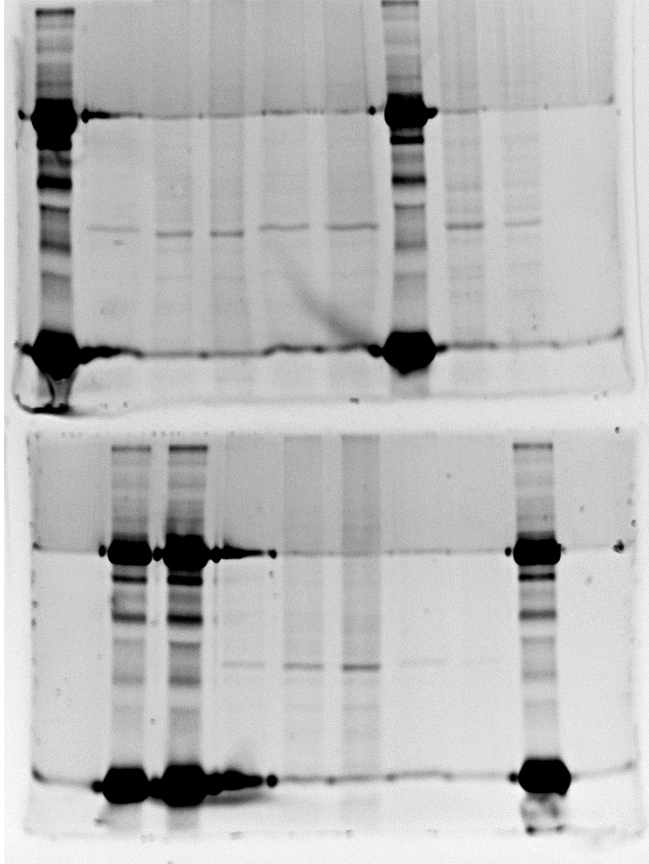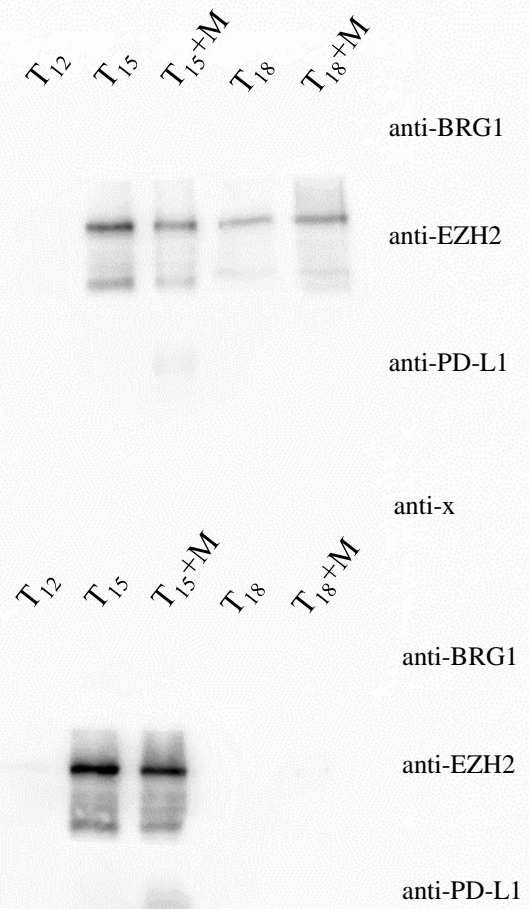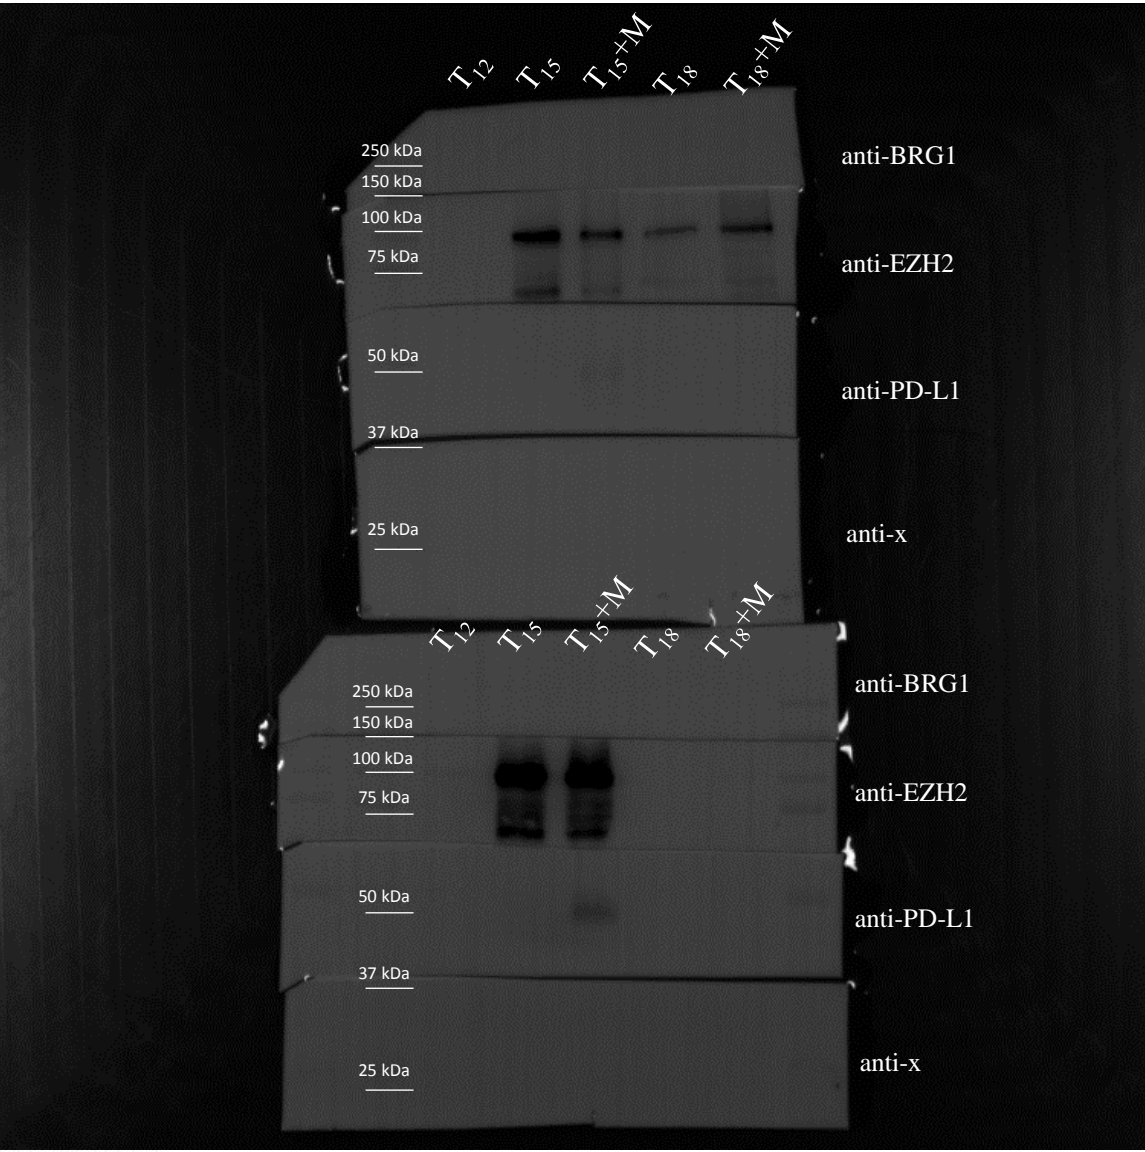

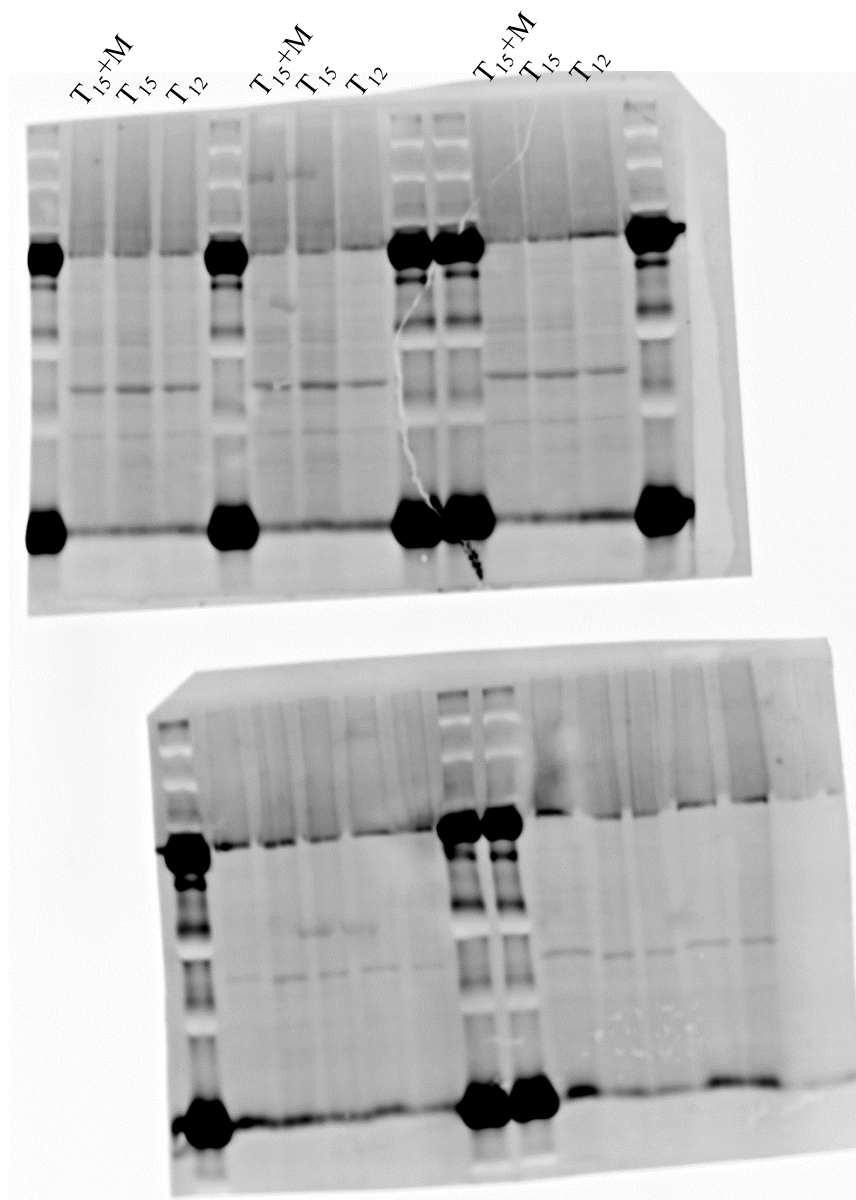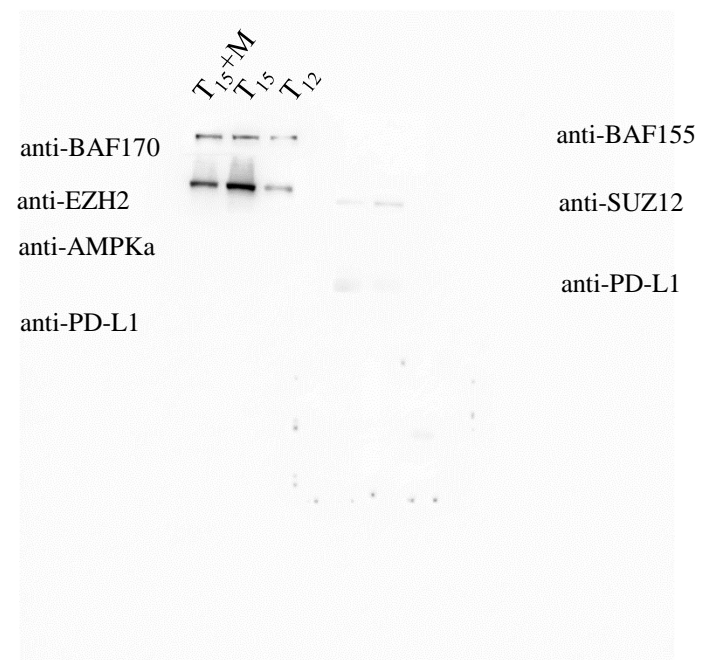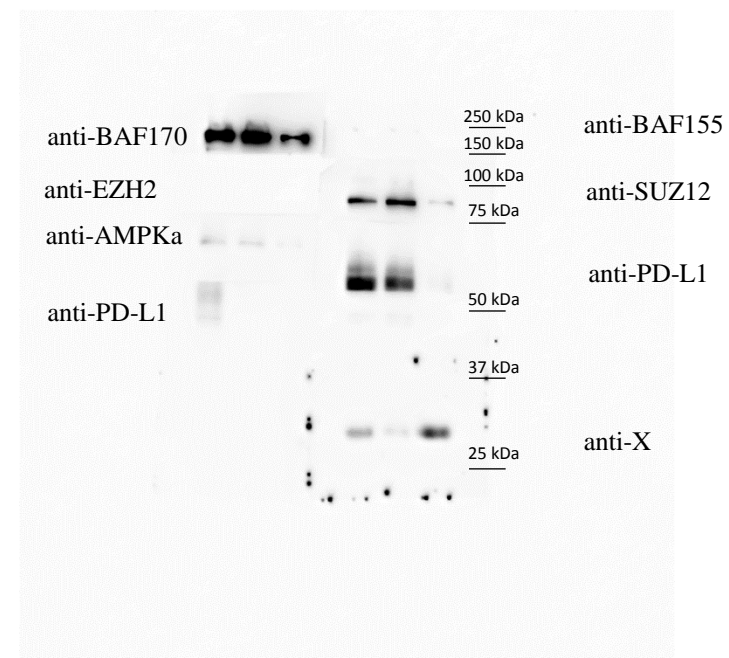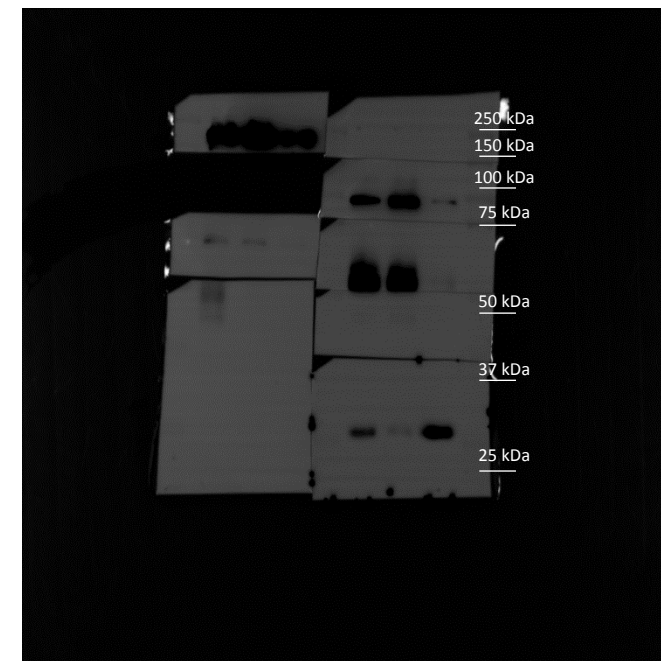

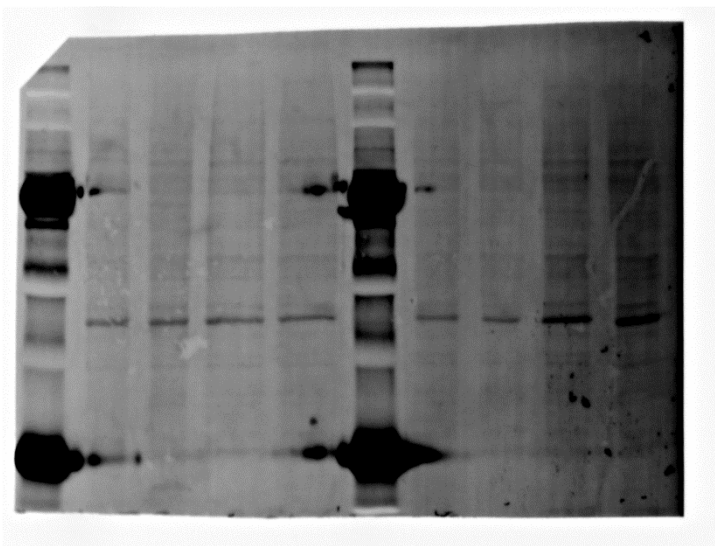

250 kDa

150 kDa

100 kDa

75 kDa

50 kDa

37 kDa

25 kDa

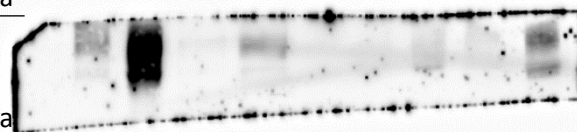

anti-PD-L1



318 i 319 WB

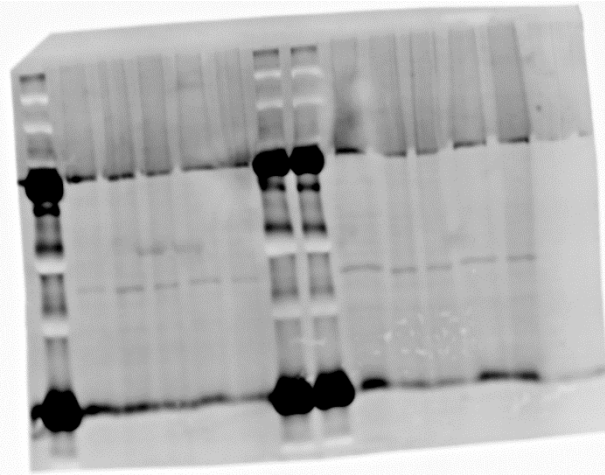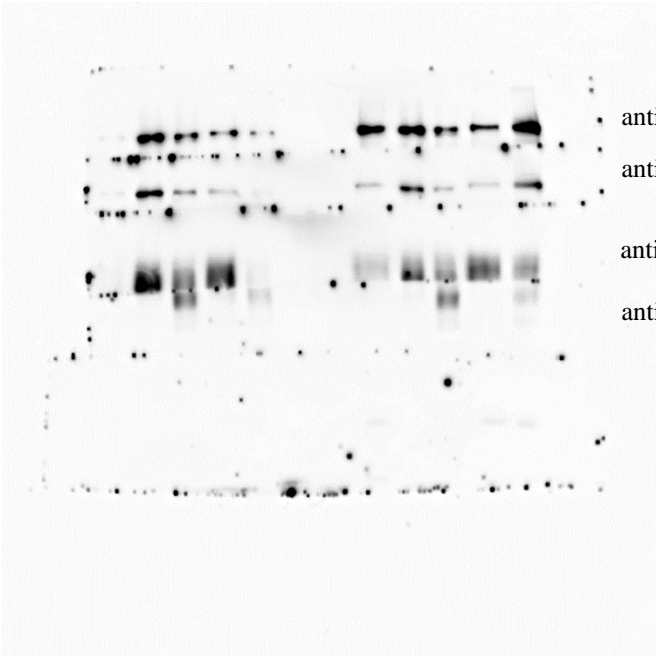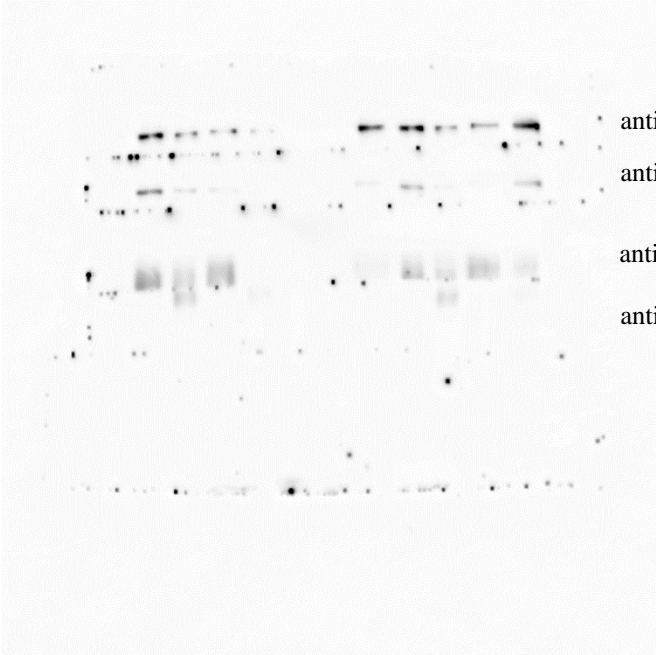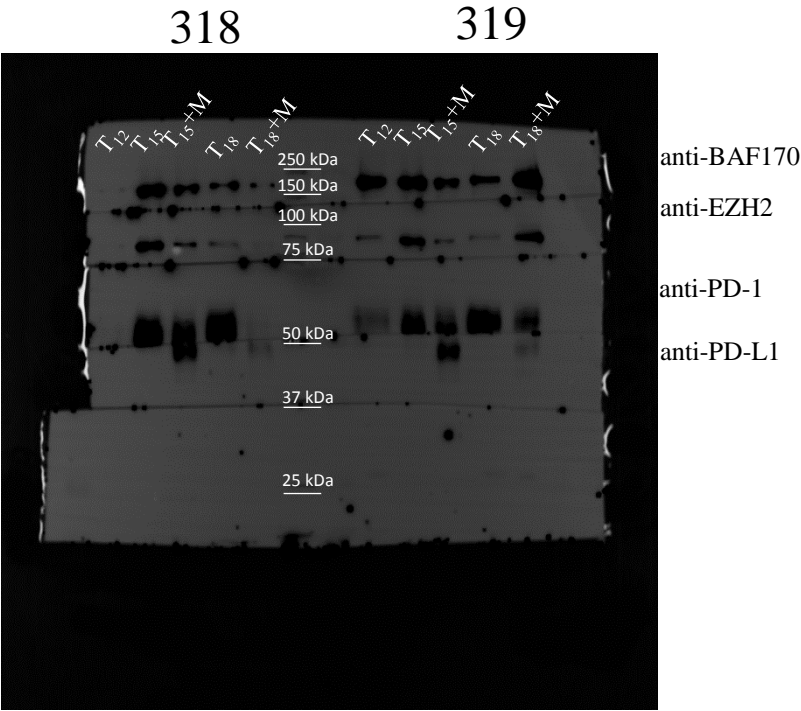

318 i 319 WB2

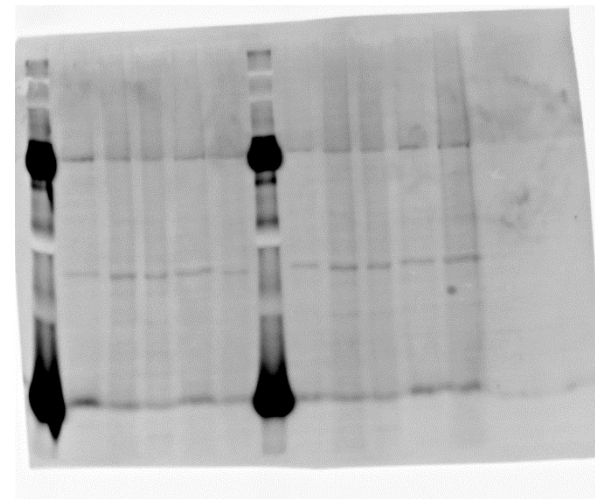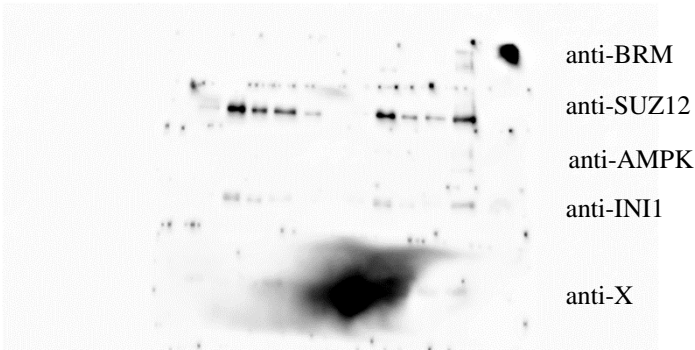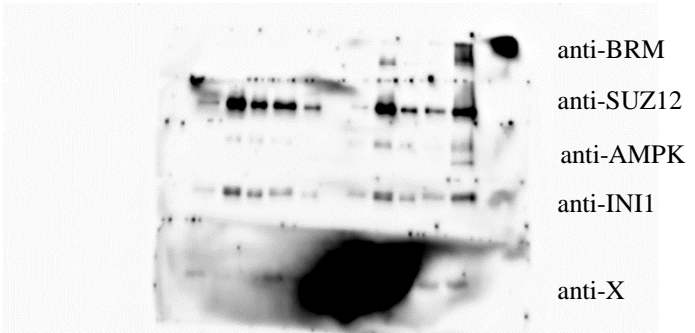

318 319

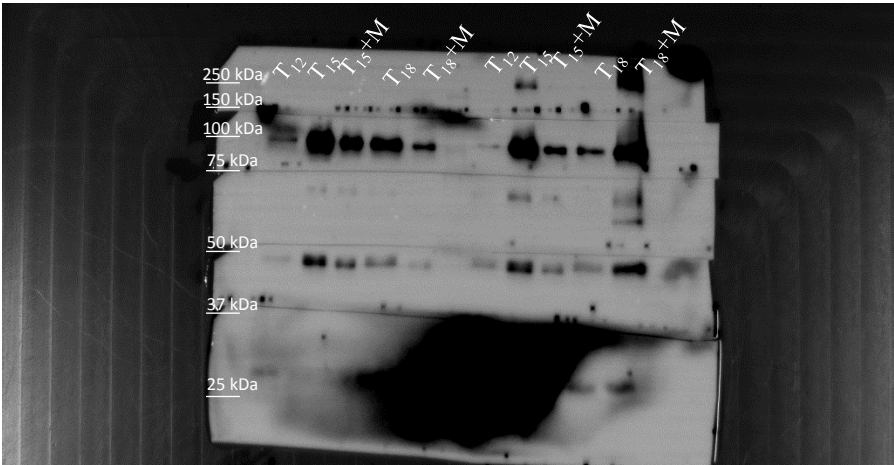

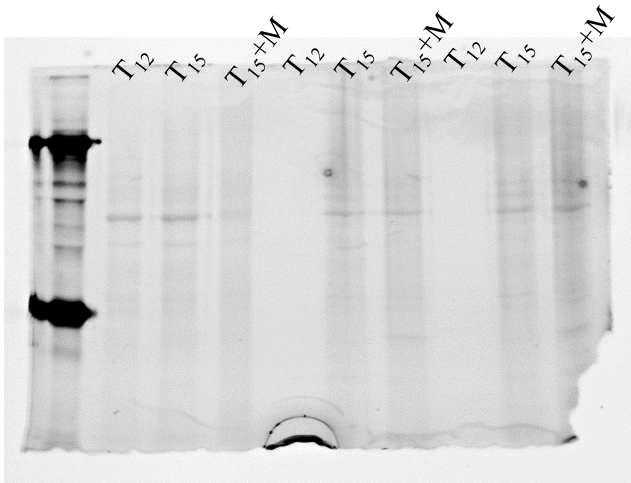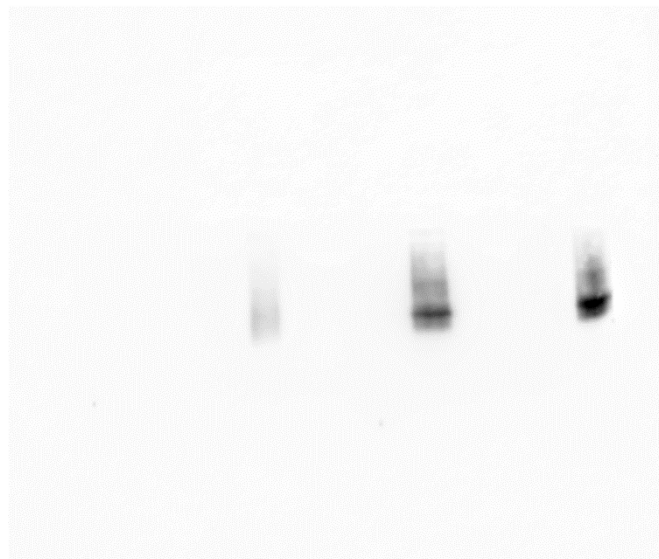

anti IL-1B

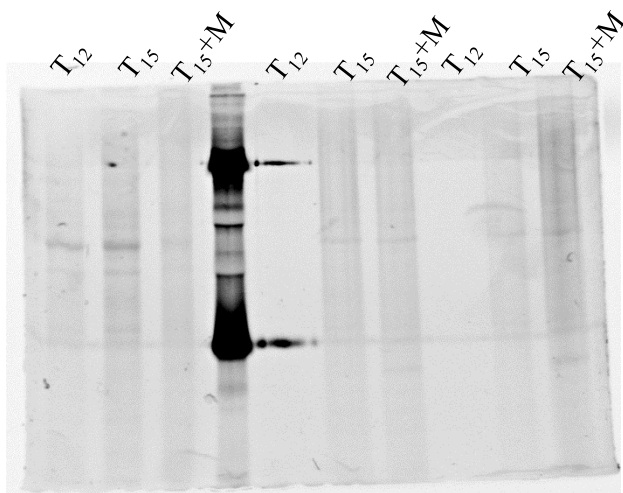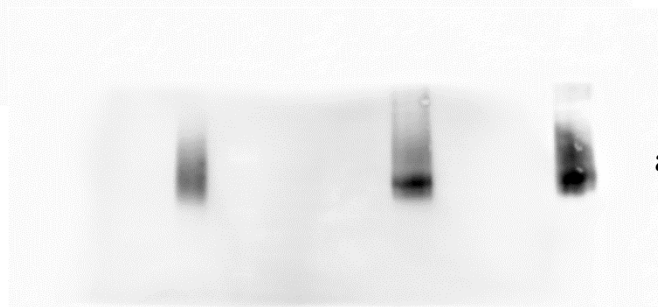

anti IL-6

Supplement: s1 [file s1]
